# Supplementary material
Source: PubMed Central journal article supplement (PMC3208600)

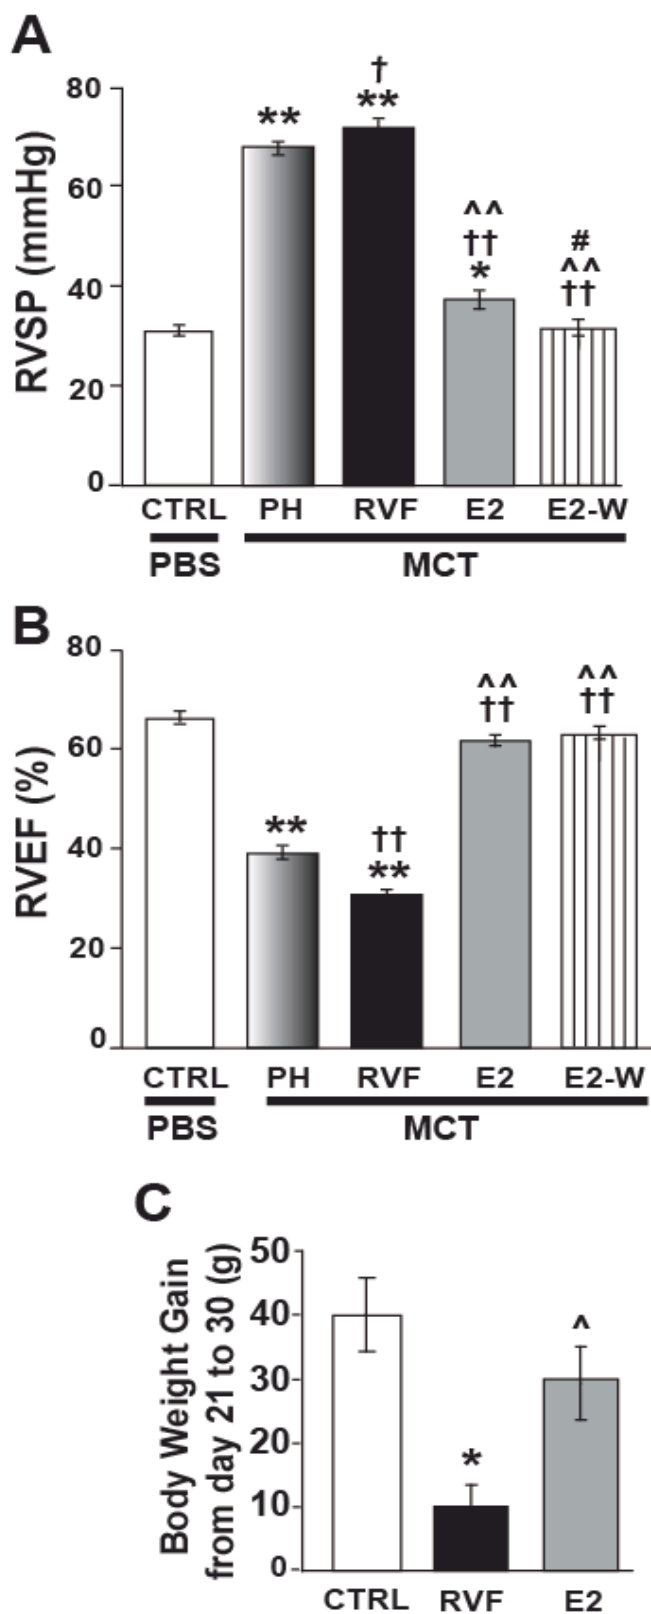

Fig E1 Umar et al

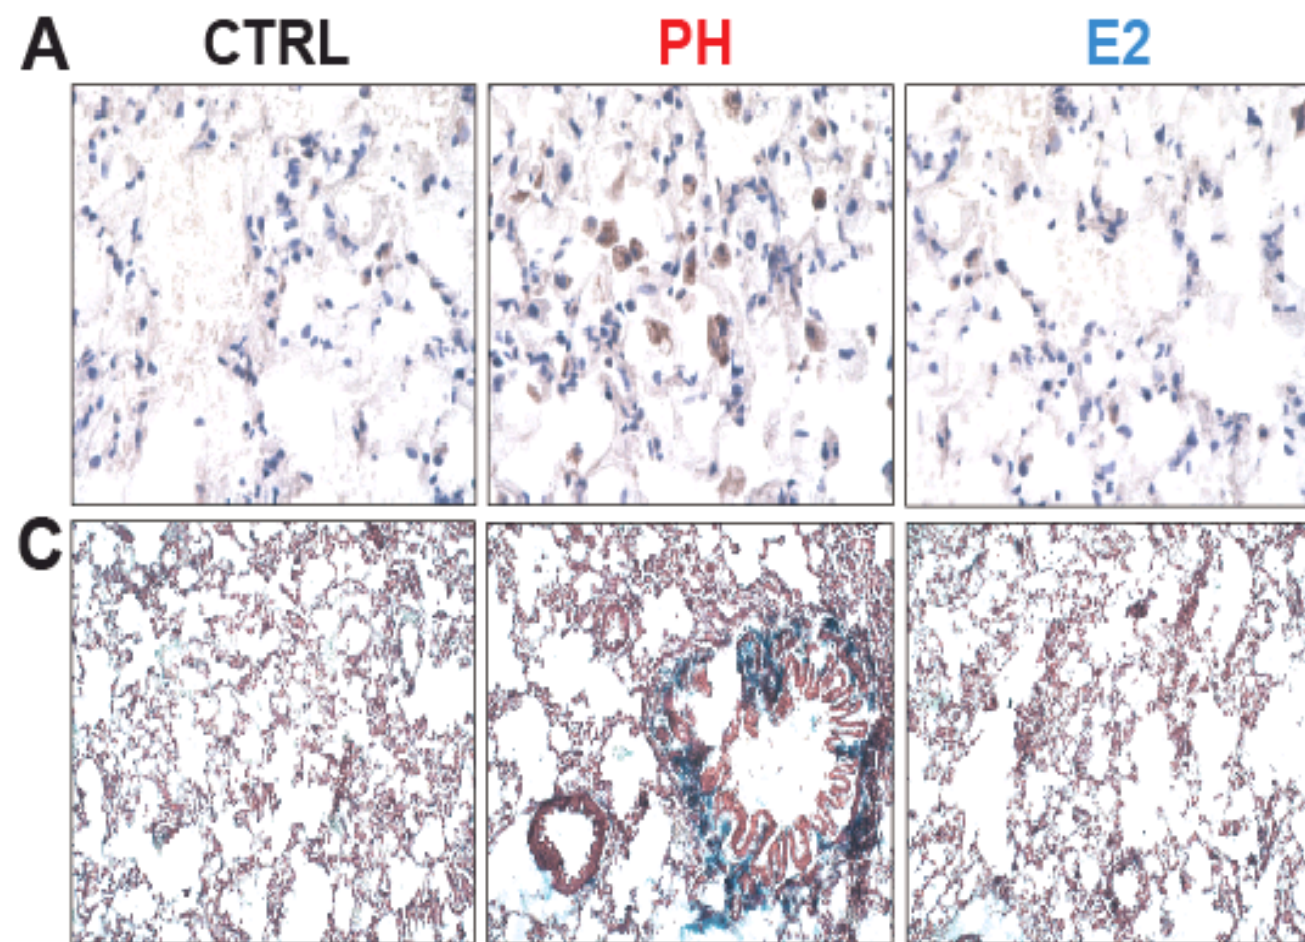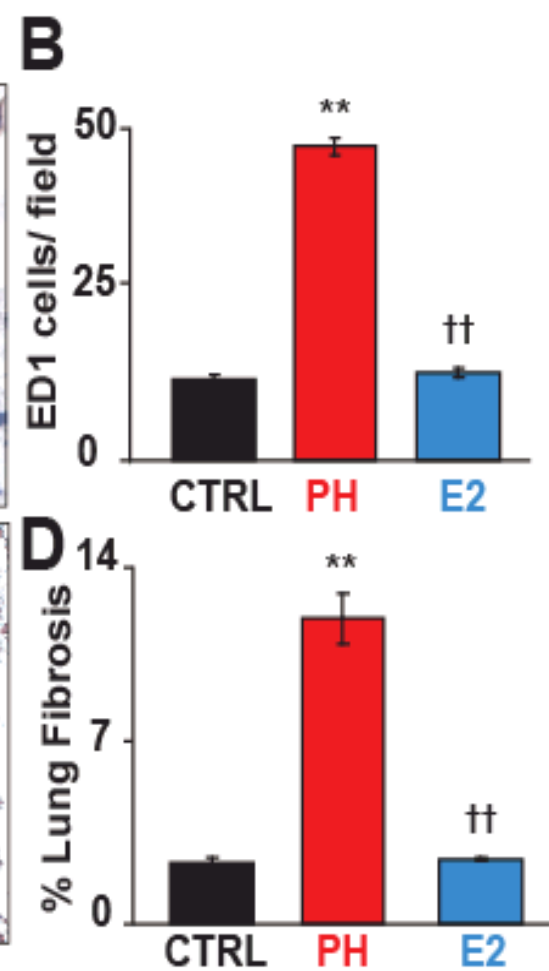

Figure E2, Umar et al

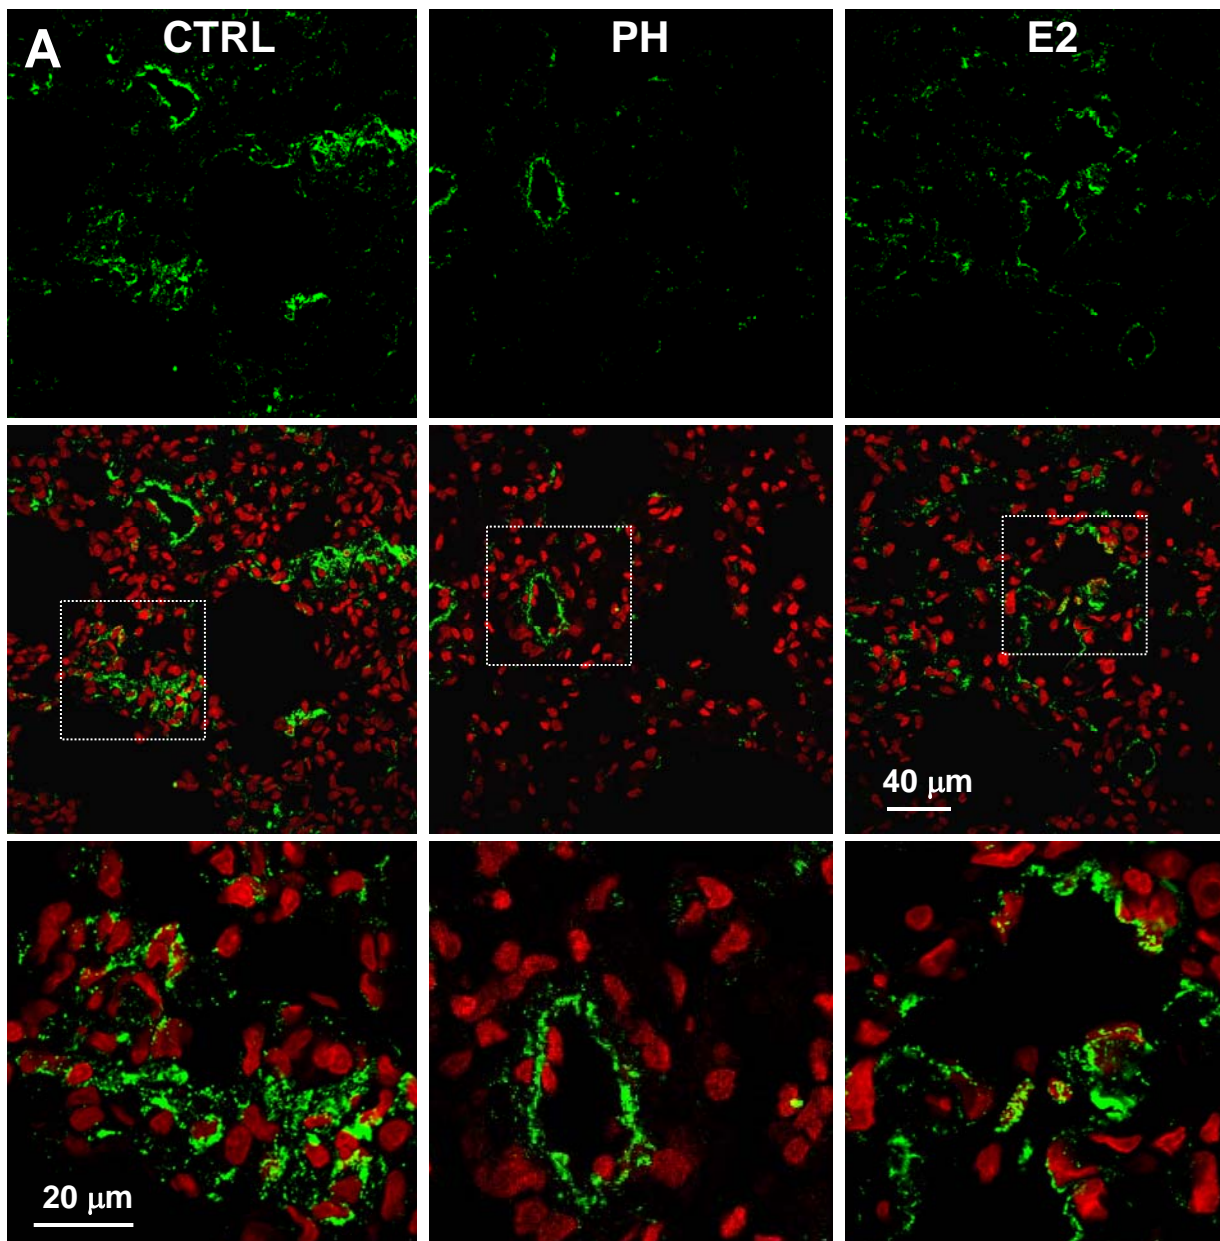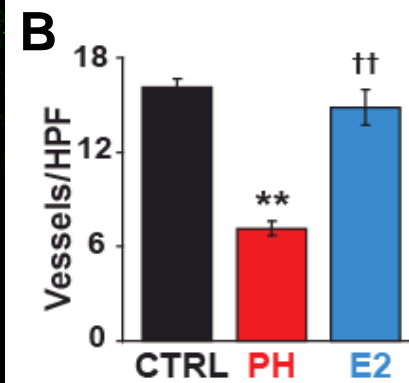

Figure E3, Umar et al

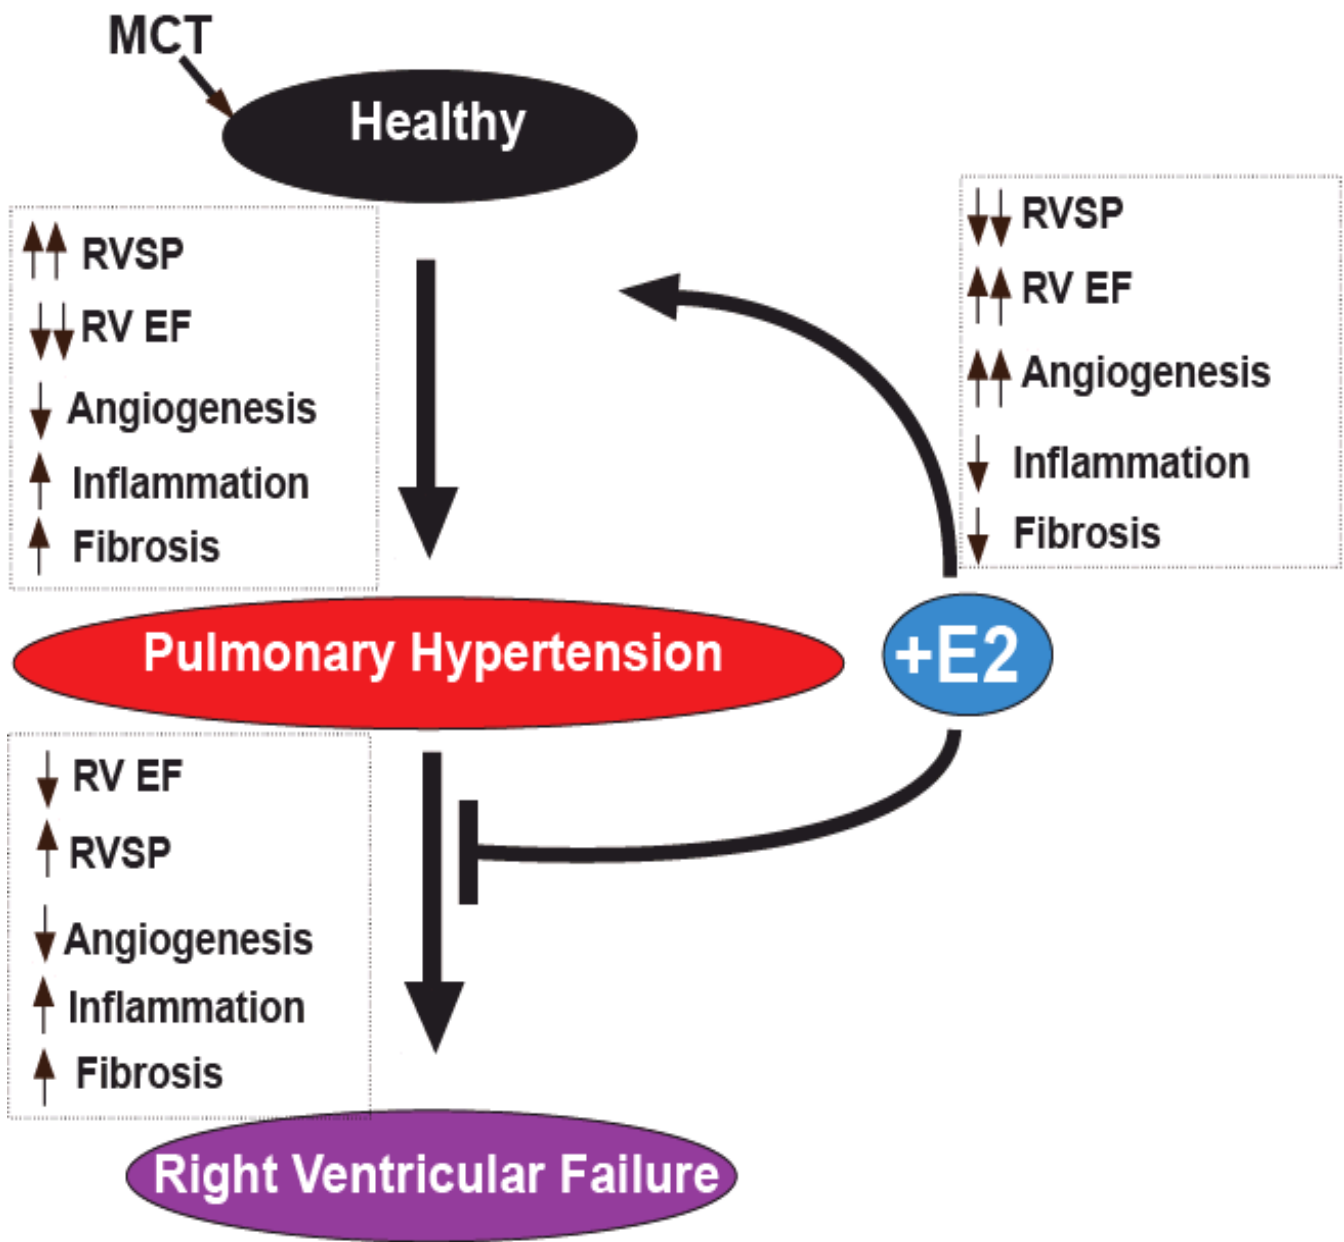

Figure E4, Umar et al

Supplement: supp_184_6_715__2.pdf [file supp_184_6_715__2.pdf]
